# Supplementary material for: Parametric estimation of P(X > Y) for normal distributions in the context of probabilistic environmental risk assessment
Source: PeerJ. 2015 Aug 18;3:e1164. doi: 10.7717/peerj.1164 (PMC4548477; doi:10.7717/peerj.1164)
Supplement: Supplemental Information 2 [file peerj-03-1164-s002.csv]

	x
1	-3.06467793097274
2	-2.53091296446982
3	-2.59420382743664
4	-2.65221802867066
5	-2.79739544544483
6	-2.82432378493685
7	-2.72019336632297
8	-3.31408964183402
9	-2.73210610897234
10	-2.69792252951935
11	-3.34693508011619
12	-3.12567788824736
13	-2.98590007548262
14	-3.36693794234275
15	-2.51631068197673
16	-2.79430995228447
17	-3.25620581014831
18	-3.05056219643749
19	-3.3931191072421
20	-2.97402452642395
21	-3.14343340542277
22	-2.9434477923298
23	-2.76601774222005
24	-3.00671760427422
25	-2.99494542657145
26	-2.78448456724278
27	-2.78457086146669
28	-3.31606804496818
29	-3.08432666895979
30	-3.25384046724797
31	-2.79693775530765
32	-3.29816744001583
33	-3.14526685754392
34	-3.07487314140514
35	-2.60251023830932
36	-2.67441605278218
37	-3.01808818013463
38	-3.04740707277247
39	-2.69581090383028
40	-2.69424704620148
41	-2.58308165359388
42	-3.46678943955674
43	-3.16969942682827
44	-3.1251379024213
45	-2.95576308075607
46	-2.61694709749577
47	-2.66087473282726
48	-2.59452335432829
49	-3.19548710779432
50	-2.88769963486128
51	-3.50514041027753
52	-2.97286735034674
53	-2.80119323305063
54	-2.55885468453737
55	-2.36772146010266
56	-3.27687743740944
57	-2.79849292466505
58	-3.31908782015125
59	-2.92042611427454
60	-3.01562572092282
61	-3.53795119138987
62	-2.74852242226039
63	-3.4207121074987
64	-3.1077279931503
65	-3.3559602970173
66	-3.34560015021446
67	-2.94467009002068
68	-3.07060100057106
69	-3.19373246389037
70	-2.58677963023275
71	-2.83434176171645
72	-3.04260357643338
73	-2.37080075329752
74	-2.37382639291814
75	-2.9258231180453
76	-3.04041645454451
77	-2.85569102255917
78	-2.70408825865807
79	-2.97143762008648
80	-3.04015759764532
81	-2.58768736433274
82	-3.30904316445308
83	-3.15297177507318
84	-3.06464755269525
85	-2.95424777919985
86	-2.98840607079388
87	-3.33980351236893
88	-2.71245257192867
89	-3.23906791680847
90	-3.12212687510612
91	-3.01827404873793
92	-2.76042788650603
93	-2.40195156060517
94	-2.72870759171141
95	-2.86530067647524
96	-2.98832722774549
97	-2.74263832808819
98	-2.8092646243644
99	-2.91190833544228
100	-2.91484647186096
101	-3.0942564896415
102	-2.58127229187792
103	-3.32607976388394
104	-3.19212197677741
105	-2.73513936432671
106	-2.84298609151969
107	-2.89424591990461
108	-2.53882881140794
109	-2.61966018868532
110	-3.09645493193611
111	-2.96507322513969
112	-3.2491400441845
113	-2.88055378281511
114	-3.26247209333484
115	-3.25031657803292
116	-2.47834643573089
117	-2.48841835620461
118	-3.27817326990616
119	-2.98763858017976
120	-3.54706206918652
121	-3.06761554600283
122	-3.21487632428558
123	-3.13481552822953
124	-2.76697703645272
125	-3.11897744940587
126	-2.7716178869534
127	-2.61199691514642
128	-2.56501409724117
129	-3.20362939338735
130	-3.24959172175506
131	-2.68719384521051
132	-2.90782041067911
133	-2.65534529923931
134	-2.89733185060453
135	-2.84481812650987
136	-2.86758434937173
137	-3.19259636001457
138	-2.85536543519939
139	-3.32486609871346
140	-3.01015287991307
141	-3.03860381798874
142	-2.94703895482321
143	-3.17711691971735
144	-2.93588881662938
145	-3.05640256508778
146	-2.68208157719026
147	-2.80331497752126
148	-3.02332506174565
149	-2.90952882241277
150	-3.154226884596
151	-2.71278899136964
152	-2.89351450725344
153	-3.1485580260951
154	-3.31643980338135
155	-2.92802541413521
156	-2.73418014246445
157	-2.84132011888096
158	-2.96756907309124
159	-2.9743821089722
160	-3.05897859243573
161	-2.80614788396901
162	-2.70382138661038
163	-3.40139116087592
164	-3.02017394449184
165	-2.61078469507015
166	-2.68632753079356
167	-2.72409122158558
168	-3.18432209289636
169	-3.38073093797696
170	-3.29996706143521
171	-2.50105539708271
172	-3.27130357166936
173	-3.1685441365938
174	-2.90135827573538
175	-2.48072846624225
176	-3.00742170778259
177	-2.84665116331255
178	-2.92240981733166
179	-2.94534273109968
180	-3.08001476807853
181	-2.61387628022189
182	-2.88736305968271
183	-3.11821192558503
184	-2.752962932994
185	-2.85584447930858
186	-2.74053250812801
187	-2.87909092271495
188	-2.84214811724196
189	-3.07291859394446
190	-2.80206831658582
191	-3.09546455539897
192	-2.81177009565558
193	-2.87868677140195
194	-2.6343567387314
195	-3.07637988062191
196	-3.33739515173859
197	-3.09788498595657
198	-3.14601918529436
199	-2.74511444835754
200	-2.97666964893987
201	-3.56034450959422
202	-3.16452302287015
203	-2.9503605332912
204	-2.73032804325148
205	-2.95368199877269
206	-2.87613385554281
207	-2.85355179070663
208	-2.965774416479
209	-3.07905939755744
210	-2.5737591066176
211	-3.03010514491162
212	-2.75602003123734
213	-2.457687230304
214	-3.02907890657689
215	-2.74764947541166
216	-3.28299265332425
217	-2.94690127668031
218	-2.70415554958913
219	-2.98545062386119
220	-2.52185805614402
221	-2.60513266064798
222	-3.2911746029367
223	-2.77641308569936
224	-2.4694368515747
225	-3.14596185605256
226	-2.94129881742371
227	-3.11106918689118
228	-2.56579879272814
229	-3.18035020056933
230	-2.65597557536181
231	-2.83362720222806
232	-2.70530841578667
233	-3.32240347006168
234	-3.1115436175966
235	-2.9113110005899
236	-3.31046915535818
237	-2.90460297732867
238	-2.54603574224349
239	-2.90100712433315
240	-3.31582648902676
241	-2.95466784830071
242	-2.99132205525314
243	-2.92722284197248
244	-2.88193960164695
245	-2.49786756151705
246	-2.53570851799462
247	-2.25391325170047
248	-3.02092869088897
249	-3.06448026258518
250	-3.1150299026461
251	-2.78758718198489
252	-3.04679577508744
253	-3.18001273951107
254	-2.84429816370069
255	-3.09299864834858
256	-2.79628943256668
257	-2.79807879929085
258	-3.05249358463451
259	-3.08099695023366
260	-3.29508238680631
261	-2.89383860374897
262	-3.18675786026013
263	-2.16192138653639
264	-3.02377313954572
265	-2.51101367336587
266	-2.89429062347529
267	-2.49205218656061
268	-2.9509779160256
269	-3.10146268810261
270	-2.67015778741675
271	-3.27669730835734
272	-2.91572835749078
273	-2.72627001091009
274	-3.32335028016913
275	-3.19810222815312
276	-2.54211665499048
277	-2.71648776452374
278	-2.51848775525637
279	-2.85840174478949
280	-2.94812841173769
281	-2.76077324604097
282	-2.96990509267426
283	-2.99391064471932
284	-3.02714957659319
285	-3.16309841189914
286	-3.01851920342715
287	-2.84730583178646
288	-2.67035649142907
289	-2.88163092135528
290	-2.92673058973874
291	-2.71160258980875
292	-2.48849636219507
293	-3.0201455323292
294	-2.61198357415609
295	-3.33271883171805
296	-3.27716934425063
297	-2.78789710326911
298	-2.98829986885852
299	-3.58895600086969
300	-2.96141272380562
301	-3.09687744701249
302	-2.4212077216073
303	-2.73502596182498
304	-3.21460505133801
305	-2.7278308390748
306	-2.39127949088382
307	-2.89607113720734
308	-3.53565167789149
309	-3.33862554162243
310	-2.79153012816483
311	-3.51932906798882
312	-2.81837936232614
313	-3.20224595420843
314	-2.77529744862657
315	-3.01121812078834
316	-2.9808710760318
317	-3.32429354836992
318	-2.60494292791036
319	-3.69077207047467
320	-3.37081099988951
321	-2.59535676918431
322	-2.62014852340784
323	-3.25697573551406
324	-3.3842040922701
325	-2.4095253823226
326	-2.76307014040538
327	-3.55573765674753
328	-3.46854218390176
329	-3.24728008047278
330	-2.72916071414191
331	-2.92062482839183
332	-3.36868630553957
333	-3.28465771714197
334	-3.34025505836256
335	-3.02279379518312
336	-2.94051426806031
337	-2.73651356531266
338	-2.66076406060212
339	-2.54811024221463
340	-2.76369093882052
341	-3.2402059935063
342	-3.06339262916301
343	-2.96042488545145
344	-2.98185438102326
345	-3.05643547067944
346	-3.01043023559222
347	-3.53700197936374
348	-3.07380699257785
349	-3.53315555880056
350	-2.76171499596236
351	-3.00337407815741
352	-2.54814039749574
353	-3.12322222715609
354	-3.22865570686057
355	-3.15014968513068
356	-3.31432269356607
357	-3.29582874474526
358	-2.65403624824391
359	-2.60652163631681
360	-3.47903088127816
361	-2.5655838190056
362	-3.17204890037165
363	-3.4820365092018
364	-2.6763677494559
365	-2.94898950830747
366	-2.40184567619508
367	-3.03086979493786
368	-2.80178410323323
369	-2.71208871956047
370	-3.04816888990578
371	-2.95234103510925
372	-2.81305772243021
373	-2.83693098381343
374	-2.88663737849252
375	-2.8164568967212
376	-2.78190815818535
377	-2.40140990260104
378	-2.97154132813067
379	-3.11462035285602
380	-2.53254408999735
381	-3.13266232389035
382	-2.81544658604015
383	-2.83269158687337
384	-3.17807819342022
385	-2.79559256182801
386	-2.73001455424595
387	-2.66766345426693
388	-3.29213561697982
389	-2.7904413726294
390	-3.39565271212534
391	-2.67625317304318
392	-3.194208975441
393	-3.15792125369912
394	-2.9755534195572
395	-2.77426272672461
396	-3.0756429124084
397	-3.21901954352224
398	-2.84395187054925
399	-3.16376769943381
400	-2.70809555825898
401	-3.00694857339122
402	-2.72877469079551
403	-2.47946218169803
404	-3.32189929206675
405	-3.02295464953628
406	-2.82807557119029
407	-2.7277620077163
408	-3.10351625884748
409	-2.87852477333785
410	-3.27065026758478
411	-2.88573976781828
412	-3.16942714798554
413	-3.02475834681563
414	-2.54880943224834
415	-3.42074033677069
416	-2.79662268914165
417	-2.59695279429402
418	-2.71770176252604
419	-3.37083001796364
420	-3.05564662334283
421	-2.92907128086314
422	-3.05025942077786
423	-3.21499427563461
424	-2.69506578887022
425	-2.76747827290143
426	-2.98203021456246
427	-3.14105366555058
428	-2.58182419010796
429	-2.6603352217343
430	-2.36368577120637
431	-2.53844231805121
432	-2.87697968941615
433	-2.93650845978407
434	-3.14449536068348
435	-3.0146680241691
436	-2.74250055328821
437	-2.93155748977052
438	-3.17336033511787
439	-3.09984563570345
440	-2.99147176078087
441	-2.31232999254632
442	-2.99917838207076
443	-3.08792071657239
444	-3.25353961129144
445	-2.90534447767235
446	-2.94418590553725
447	-2.80329271719235
448	-3.08569933771683
449	-3.33937195267386
450	-2.75633795394352
451	-3.24565962246289
452	-3.02436084967863
453	-2.77045310446523
454	-2.9195735401762
455	-2.83926412452191
456	-2.63352466040611
457	-3.15753478827153
458	-3.18566737815732
459	-2.38639185818509
460	-2.95816751340863
461	-2.59480112681212
462	-2.72407575505886
463	-2.79504992950377
464	-3.05627396159327
465	-2.65115612392875
466	-3.15574851886701
467	-3.28588075710338
468	-3.28760720432496
469	-2.47006421131212
470	-2.53759560922547
471	-2.80618145443862
472	-2.83808656706146
473	-3.13970909515864
474	-2.63377606899249
475	-3.30489678842334
476	-3.50316451719161
477	-2.84080144089372
478	-2.95078487612853
479	-2.90615438270284
480	-3.53924620611183
481	-3.40172296299104
482	-3.40909445582181
483	-2.90576458144627
484	-2.70163940920891
485	-2.66025203758733
486	-2.73649486371528
487	-3.09074764348369
488	-2.65647424492171
489	-3.1179539741285
490	-3.21742348053862
491	-2.99922661794992
492	-2.95414929090395
493	-3.08832311145253
494	-3.23607245054992
495	-3.00108400933079
496	-2.55931152550731
497	-3.39718487635644
498	-2.94583790283149
499	-3.00129353777335
500	-2.91888948561079
501	-2.66078377483536
502	-2.76713906809076
503	-3.01723908594874
504	-3.12326766327627
505	-2.75859854441167
506	-2.98147293656629
507	-2.78265450968152
508	-3.31917499819896
509	-2.8509363338167
510	-3.36168999292599
511	-2.7192388815079
512	-2.18935847651553
513	-2.67425018926529
514	-3.19336301423133
515	-3.07278606079197
516	-3.28113070212064
517	-2.99653694050725
518	-2.66481555400328
519	-2.603503480104
520	-2.63593926034223
521	-2.92300402012549
522	-2.7703433219304
523	-3.08558022230316
524	-2.87942908134705
525	-3.04804256107809
526	-2.94685891226426
527	-2.8615277505719
528	-3.30726544704001
529	-3.0351006438869
530	-2.82952754861874
531	-3.28555733503464
532	-3.19937792505278
533	-2.58302299738389
534	-2.85656367699799
535	-3.74757972064767
536	-2.87581444354383
537	-3.40021585832043
538	-2.89267208063774
539	-3.0275804925838
540	-2.84757520135218
541	-2.66213558786992
542	-2.84304288723829
543	-3.13752442193616
544	-2.7369627976743
545	-2.71954377139097
546	-3.53642836569054
547	-2.85001405505406
548	-2.67872454813865
549	-2.87908490416619
550	-2.42558295120318
551	-2.59740364731005
552	-3.08216163207087
553	-2.94507076430242
554	-2.4732596995809
555	-3.28700124950803
556	-2.83160190139076
557	-2.84408262395857
558	-2.51398917234587
559	-2.86918342474259
560	-2.5860437456332
561	-2.81768899125425
562	-3.02286238690612
563	-2.98123686320422
564	-2.99992612722539
565	-3.15088036452596
566	-2.57795665851668
567	-2.57400357720085
568	-2.99302654146334
569	-2.31640813906841
570	-2.66744854577978
571	-2.80997167675205
572	-3.02917256679094
573	-2.94075452273673
574	-3.2858174519992
575	-2.87664101814827
576	-2.64135898679532
577	-3.2515777727228
578	-2.55978202692034
579	-3.24366861542119
580	-3.02337313236922
581	-3.01520346153729
582	-2.78692718084584
583	-3.05195682530663
584	-2.95249812115404
585	-2.96321273299657
586	-2.78599597801736
587	-3.05868728352034
588	-2.74508844307362
589	-3.2421675436898
590	-2.97279872814183
591	-3.72691473250739
592	-3.12951000616461
593	-3.12839261575029
594	-2.85054958374991
595	-3.17083507354719
596	-2.73488617386388
597	-2.85212086134754
598	-3.13950389562428
599	-3.1396306084975
600	-2.90538192248544
601	-2.72421525868939
602	-3.00177758255003
603	-2.79361924035396
604	-2.96179009980092
605	-2.91967337034502
606	-2.69924010876889
607	-3.15872591725478
608	-3.0313057980125
609	-3.01503942268265
610	-2.57203303174577
611	-3.16714564482235
612	-3.02249083223545
613	-3.54737355055615
614	-3.72536923487116
615	-2.79646161458857
616	-2.51716029917725
617	-2.75720567039822
618	-2.88684132385607
619	-2.67204084113364
620	-2.8622987381429
621	-2.79523859309663
622	-2.70735845003138
623	-3.67848874571086
624	-2.7998617976829
625	-3.04154483440935
626	-2.61927981966797
627	-2.57430102310162
628	-3.39338481180431
629	-2.79754778260297
630	-2.76611687727702
631	-3.00672896432377
632	-2.34524016358876
633	-2.90483224452726
634	-2.7787317586865
635	-2.89133372090608
636	-3.39515615163131
637	-2.97889842222636
638	-2.83853798933293
639	-2.69196014111284
640	-2.70594446743559
641	-3.01951656420362
642	-3.03823024217843
643	-2.75938177928781
644	-3.307921440203
645	-3.31484930774898
646	-2.85986377887591
647	-3.2543677541072
648	-3.12249147303555
649	-3.17278202107463
650	-2.67129029137894
651	-2.34154844243924
652	-3.09737238649797
653	-2.83262928039199
654	-2.74466820725976
655	-2.81224339791732
656	-2.90345801776983
657	-3.26670137914369
658	-2.96278349438678
659	-2.96747635148443
660	-2.96902376622008
661	-2.88371462094981
662	-3.42595462498374
663	-2.89495682254158
664	-3.32821234876286
665	-3.09974565252261
666	-2.64062319161956
667	-2.62039367593781
668	-2.43126818078877
669	-3.24459223656272
670	-3.14993501449484
671	-3.58840192051134
672	-3.10220476773719
673	-2.72499836011621
674	-2.84805435002015
675	-2.70786003779231
676	-2.98688201550142
677	-2.96056967384248
678	-2.96566884398014
679	-2.30990588495053
680	-2.71101180404408
681	-2.95266660854746
682	-3.15052658306184
683	-2.63003170161156
684	-2.73270841806225
685	-2.8411021755668
686	-2.58298588181203
687	-2.92491415147224
688	-2.87245758876523
689	-2.9046757499389
690	-2.99759529143008
691	-2.96952181080222
692	-2.73676391346134
693	-2.5664411677295
694	-3.38039732942444
695	-3.34290562718379
696	-2.59086037182271
697	-3.17194285326433
698	-2.49014992797287
699	-2.89901629812685
700	-2.87553402615943
701	-2.54990127952493
702	-2.96762191412101
703	-2.69036588809288
704	-3.61929028879286
705	-3.21440579374399
706	-2.82257204122217
707	-3.12433165813024
708	-2.76747609538154
709	-3.01150010347266
710	-2.9044356971294
711	-3.14081971440602
712	-2.70314425464864
713	-3.11371285849432
714	-3.06762494949404
715	-2.84089172290922
716	-3.05699714214064
717	-2.61160884567255
718	-2.82241827466153
719	-3.19330786115167
720	-2.77495173553465
721	-2.33341769213082
722	-2.78077163607392
723	-3.18389235313489
724	-3.2169693014986
725	-2.25208078378955
726	-3.32532379237416
727	-3.08751962449579
728	-3.18206678319361
729	-2.60841298553048
730	-2.95480259999815
731	-3.31817069910536
732	-3.0927042105372
733	-2.87547639500067
734	-2.86049089317207
735	-2.621814584771
736	-2.78367861764928
737	-2.8728592990672
738	-2.75739367236488
739	-3.29967687712089
740	-2.69303264608141
741	-2.46544700931622
742	-2.80845203348465
743	-3.35471599902751
744	-2.79395721921877
745	-2.87144241282317
746	-2.89639905007715
747	-3.27064121603264
748	-3.1495268778768
749	-3.11284219037892
750	-2.75095952588128
751	-3.21299247605262
752	-3.40808534253941
753	-3.25655760460532
754	-2.96914686563884
755	-2.52850125305249
756	-3.19419338345213
757	-2.47034843756143
758	-2.93831799986394
759	-3.01709071424808
760	-2.79011445179049
761	-2.64991666950696
762	-2.98783668890404
763	-3.34987372462738
764	-2.83875605812189
765	-3.30367910592839
766	-2.67242436567014
767	-2.73972420405448
768	-3.04995770448951
769	-3.08855252443466
770	-3.26973696964468
771	-2.96382104305955
772	-3.16115092813754
773	-2.72065796399823
774	-2.84363606658243
775	-3.37007458741784
776	-2.9273447892657
777	-2.56581696679071
778	-3.01087684324843
779	-3.49485416221089
780	-3.45855693554834
781	-2.76809872057567
782	-3.24807564742139
783	-3.36914939225379
784	-2.89078100697811
785	-2.85887717028998
786	-2.47408107905565
787	-3.27592256964002
788	-2.73947043329445
789	-2.7123098511919
790	-2.54590821719318
791	-2.87886880580401
792	-2.93363129927866
793	-3.26052826903132
794	-3.13809723091202
795	-3.12301814996767
796	-2.98752273465049
797	-3.03283807558335
798	-2.70824249512444
799	-2.88691164961397
800	-2.79054253120537
801	-3.11467634056496
802	-3.02243817215304
803	-2.66982214792262
804	-2.7828045669676
805	-3.01164388840432
806	-3.09554074284883
807	-3.52204514604213
808	-3.15545249874716
809	-2.85544145746669
810	-3.4075478373867
811	-2.64323606914023
812	-3.37867610216701
813	-3.18257488683781
814	-3.14616750583344
815	-2.89389835721822
816	-3.12653686079967
817	-2.86440381208672
818	-3.10680387127216
819	-2.9407676318245
820	-2.52215478574193
821	-3.18229819391786
822	-3.5282914704777
823	-3.13865883314981
824	-2.73874847327341
825	-2.61930391549599
826	-3.23876204249431
827	-3.00138496642452
828	-3.09443076775093
829	-3.12886480144149
830	-3.41043310207086
831	-2.69261714152567
832	-2.73919100313444
833	-3.34380660680381
834	-3.00062482097368
835	-3.27474760422584
836	-3.16254500518416
837	-2.58923572835588
838	-2.48870430520697
839	-2.70259206101266
840	-3.00358283859952
841	-3.02013875560395
842	-2.44701720451717
843	-2.94455597523008
844	-3.27592352050296
845	-2.64654781945768
846	-3.01140782085966
847	-2.93160860606572
848	-3.509308687382
849	-3.413027426926
850	-3.38071937541093
851	-2.904102297096
852	-2.55316505732015
853	-3.21542935400286
854	-3.00372228024865
855	-2.79293251167887
856	-2.99850740067357
857	-2.91202456930489
858	-2.84832419865228
859	-2.93136320332663
860	-2.857757243904
861	-3.04221986095815
862	-2.93142020815382
863	-2.46193054599322
864	-2.7389128624548
865	-2.44075746304284
866	-3.39592125595271
867	-2.77935533283615
868	-2.47105937188039
869	-2.96218446802409
870	-3.19793163618046
871	-2.96799330291351
872	-3.3851050357756
873	-2.65909666969714
874	-2.98341313409266
875	-3.02741668909312
876	-3.0048876992333
877	-2.49982998085297
878	-3.32241208979652
879	-2.80084940155406
880	-2.62586561851993
881	-3.3864932336805
882	-3.15448213702557
883	-2.79184775538908
884	-2.68047438568456
885	-3.58706711423174
886	-2.89379536659635
887	-2.86789322436683
888	-3.35169961275518
889	-3.1717370534224
890	-3.333217110021
891	-2.97941371240314
892	-2.37215389292968
893	-2.76424072022026
894	-2.71905384297518
895	-2.91541657736034
896	-3.14165475164251
897	-2.91088774661892
898	-2.84091498524395
899	-2.53240848011245
900	-2.81581064753574
901	-2.45450549540034
902	-2.44288621140437
903	-2.69815812591118
904	-2.82606585368138
905	-2.67479736667762
906	-2.71054868609327
907	-2.94993993529285
908	-2.57938491360808
909	-2.84790284040806
910	-3.4362730419024
911	-2.9435439098923
912	-2.68586370943829
913	-3.16335580131366
914	-2.86288244241506
915	-2.95223756283349
916	-2.52562121854125
917	-3.00214753122856
918	-2.94562085325662
919	-3.0041973700222
920	-3.06385428642727
921	-3.19937144436574
922	-3.25713737126944
923	-2.61376718583403
924	-2.76143222303286
925	-2.83334541426712
926	-2.87595331961106
927	-3.24038079931236
928	-2.35491302796626
929	-3.48498564078476
930	-2.88356339899606
931	-2.40749236345801
932	-2.68142708049365
933	-2.90586375186603
934	-2.82178370370894
935	-3.00740268490139
936	-3.02898568695175
937	-2.3912934357311
938	-2.62880836430513
939	-2.7243056063779
940	-2.96386977149657
941	-3.11668840016541
942	-3.19627783517222
943	-2.60303824613423
944	-2.63068358741394
945	-2.79164877385044
946	-3.21951487306251
947	-2.8598852614597
948	-2.58776296015906
949	-2.87249514754596
950	-2.69834548290587
951	-2.94626031710343
952	-2.87384340864577
953	-3.00706369522789
954	-3.23203112743052
955	-3.08124845652174
956	-2.61797045506448
957	-3.07053718928174
958	-3.08812291444556
959	-2.75399519956414
960	-3.31653161433214
961	-2.63295498351331
962	-3.3762909118858
963	-2.9853708170103
964	-2.79153880201258
965	-3.02084027763345
966	-2.74454538555061
967	-3.31157425390492
968	-3.08587992712858
969	-3.39677294829916
970	-3.31325162561867
971	-3.59341220487534
972	-2.85785035097618
973	-2.96289804234568
974	-3.351336757913
975	-2.83010085197231
976	-2.42557237733896
977	-2.90149295334358
978	-3.07139980130624
979	-2.96869767928506
980	-2.95641730847125
981	-3.11421039705397
982	-2.3286287190188
983	-2.94628323401191
984	-3.14807082076716
985	-2.89061158118215
986	-3.05833878554875
987	-3.3022842513916
988	-2.849410366303
989	-2.83181527273776
990	-2.95292041246629
991	-3.61825602302787
992	-2.41345378691855
993	-3.2268072323793
994	-2.78916337633099
995	-2.82044888664191
996	-2.91129931294829
997	-2.72269060765727
998	-3.38019630573834
999	-2.62328629568114
1000	-2.88956181508345
