# Supplementary material for: Parametric estimation of P(X > Y) for normal distributions in the context of probabilistic environmental risk assessment
Source: PeerJ. 2015 Aug 18;3:e1164. doi: 10.7717/peerj.1164 (PMC4548477; doi:10.7717/peerj.1164)
Supplement: Supplemental Information 3 [file peerj-03-1164-s003.csv]

	x
1	2.04139268515822
2	1.31874486475626
3	4.39794000867204
4	-0.0655015487564323
5	1.27875360095283
6	-1.41439922657516
7	1.54845500650403
8	-0.585653983771235
9	-0.397940008672038
10	0.711725340762309
11	1.55780525583715
12	-0.552841968657781
